# Supplementary material for: Brittle-flexible-brittle transition in nanocrystalline zirconia nanofibrous membranes
Source: Royal Society of Chemistry journal article supplement (doi:10.1039/c5ce02382c), 2016-01-01
Supplement: c5ce02382c1.pdf [file c5ce02382c1.pdf]

Electrical Supplementary Information for

**Brittle-flexible-brittle transition in nanocrystalline zirconia nanofibrous  
membranes**

Xue Mao,<sup>a</sup> Haoru Shan,<sup>b</sup> Jun Song,<sup>a</sup> Ying Bai,<sup>a</sup> Jianyong Yu<sup>c</sup> and Bin Ding<sup>\*abcd</sup>

*<sup>a</sup>State Key Laboratory for Modification of Chemical Fibers and Polymer Materials, College of Materials Science and Engineering, Donghua University, Shanghai 201620, China*

*<sup>b</sup>Key Laboratory of Textile Science & Technology, Ministry of Education, College of Textiles, Donghua University, Shanghai, 201620, China*

*<sup>c</sup>Nanofibers Research Center, Modern Textile Institute, Donghua University, Shanghai 200051, China*

*<sup>d</sup>Key Laboratory of High Performance Fibers and Products Ministry of Education, Donghua University, Shanghai, 201620, China*

\*Corresponding author. E-mail: binding@dhu.edu.cn; Phone: +86-21-62378202; Fax: +86-21-62378202

**Table S1** Summary of lattice parameters and grain size of theoretical zirconia and experimental zirconia and yttria stabilized zirconia (YSZ) nanofibrous membranes with yttria contents from 2 to 20 mol%.

| Yttria content (mol%)         | Lattice constants |       |       |              |             |              | Grain size (nm) |            |       |
|-------------------------------|-------------------|-------|-------|--------------|-------------|--------------|-----------------|------------|-------|
|                               | a (Å)             | b (Å) | c (Å) | $\alpha$ (°) | $\beta$ (°) | $\gamma$ (°) | Monoclinic      | Tetragonal | Cubic |
| 0                             | 5.312             | 5.182 | 5.148 | 90           | 99.2        | 90           | 25.8            | 36.1       | -     |
| 2                             | 3.612             | -     | 5.176 | 90           | 90          | 90           | -               | 28.8       | -     |
| 4                             | 3.620             | -     | 5.161 | 90           | 90          | 90           | -               | 26.6       | -     |
| 6                             | 3.628             | -     | 5.144 | 90           | 90          | 90           | -               | 23.8       | -     |
| 8                             | 5.136             | -     | -     | 90           | 90          | 90           | -               | -          | 18.7  |
| 10                            | 5.129             | -     | -     | 90           | 90          | 90           | -               | -          | 15.4  |
| 12                            | 5.133             | -     | -     | 90           | 90          | 90           | -               | -          | 13.5  |
| 14                            | 5.142             | -     | -     | 90           | 90          | 90           | -               | -          | 12.6  |
| 16                            | 5.143             | -     | -     | 90           | 90          | 90           | -               | -          | 12.3  |
| 18                            | 5.144             | -     | -     | 90           | 90          | 90           | -               | -          | 11.2  |
| 20                            | 5.135             | -     | -     | 90           | 90          | 90           | -               | -          | 10.6  |
| Theoretical lattice constants |                   |       |       |              |             |              |                 |            |       |
| Monoclinic                    | 5.145             | 5.207 | 5.311 | 90           | 99.2        | 90           | -               | -          | -     |
| Tetragonal                    | 3.640             | -     | 5.270 | 90           | 90          | 90           | -               | -          | -     |
| Cubic                         | 5.090             | -     | -     | 90           | 90          | 90           | -               | -          | -     |

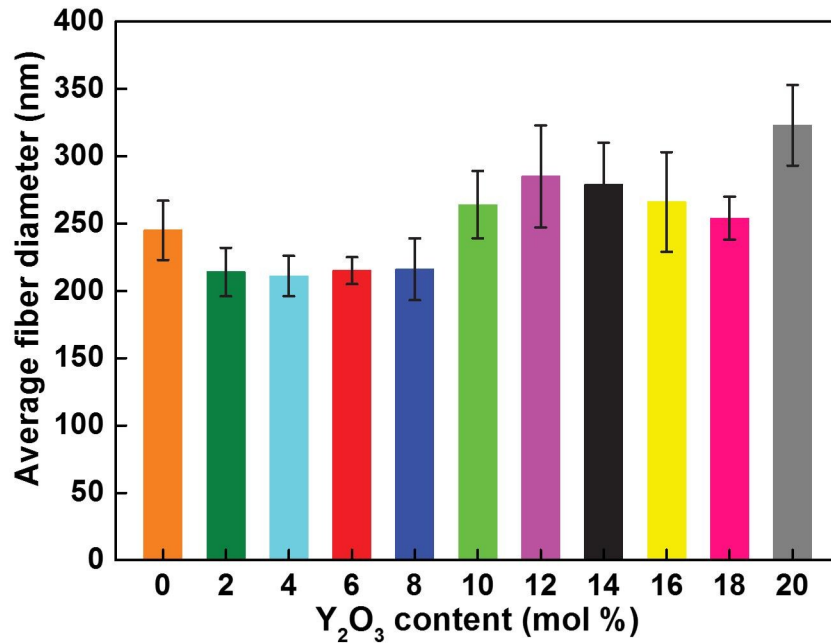

**Fig. S1** Average fiber diameters of zirconia and YSZ nanofibers with yttria contents from 2 to 20 mol%.

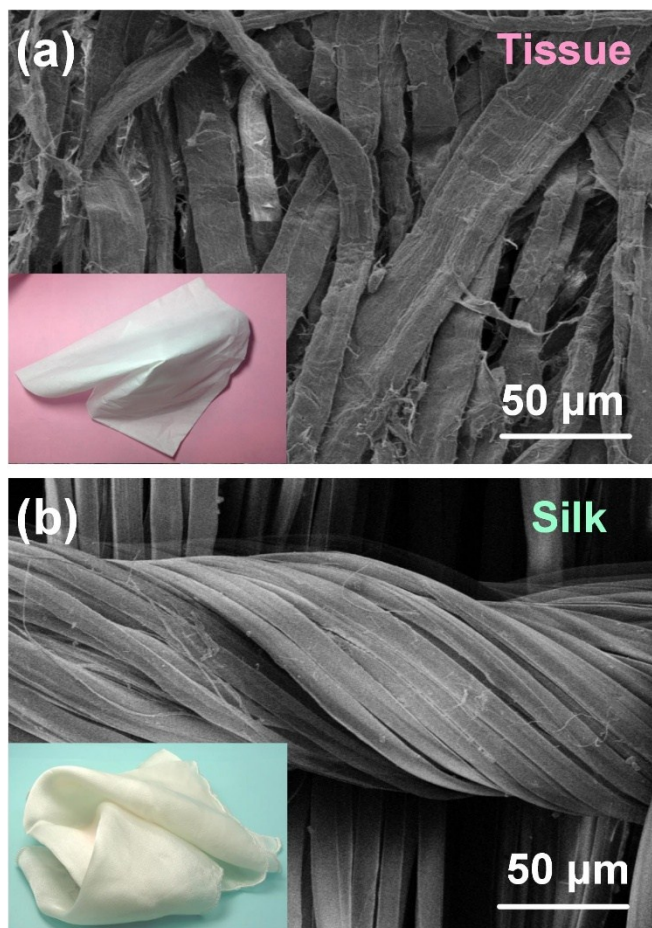

**Fig. S2** FE-SEM images of (a) tissue and (b) silk. The insets show the photographs of tissue and silk, respectively.

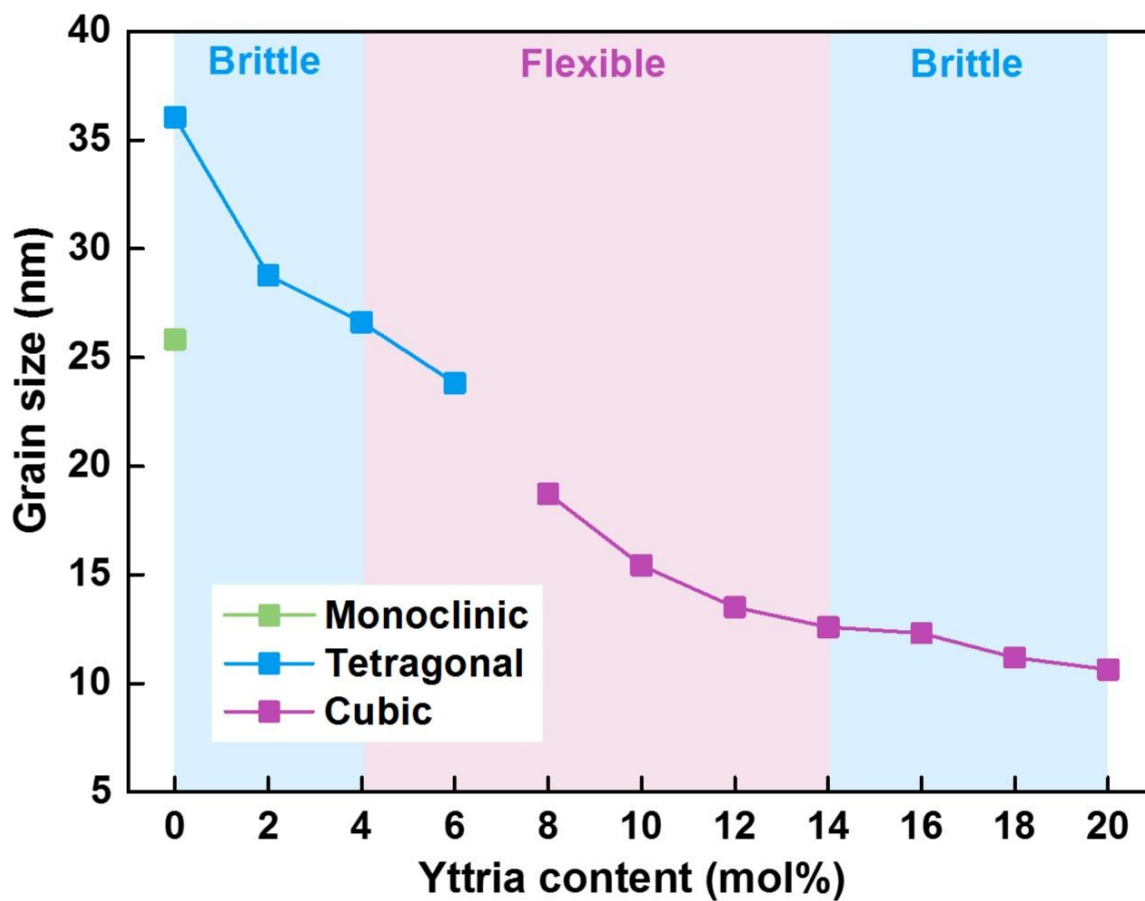

**Fig. S3** Flexible (pink) and brittle (blue) regions of zirconia and YSZ nanofibrous membranes with different crystal forms and grain sizes.

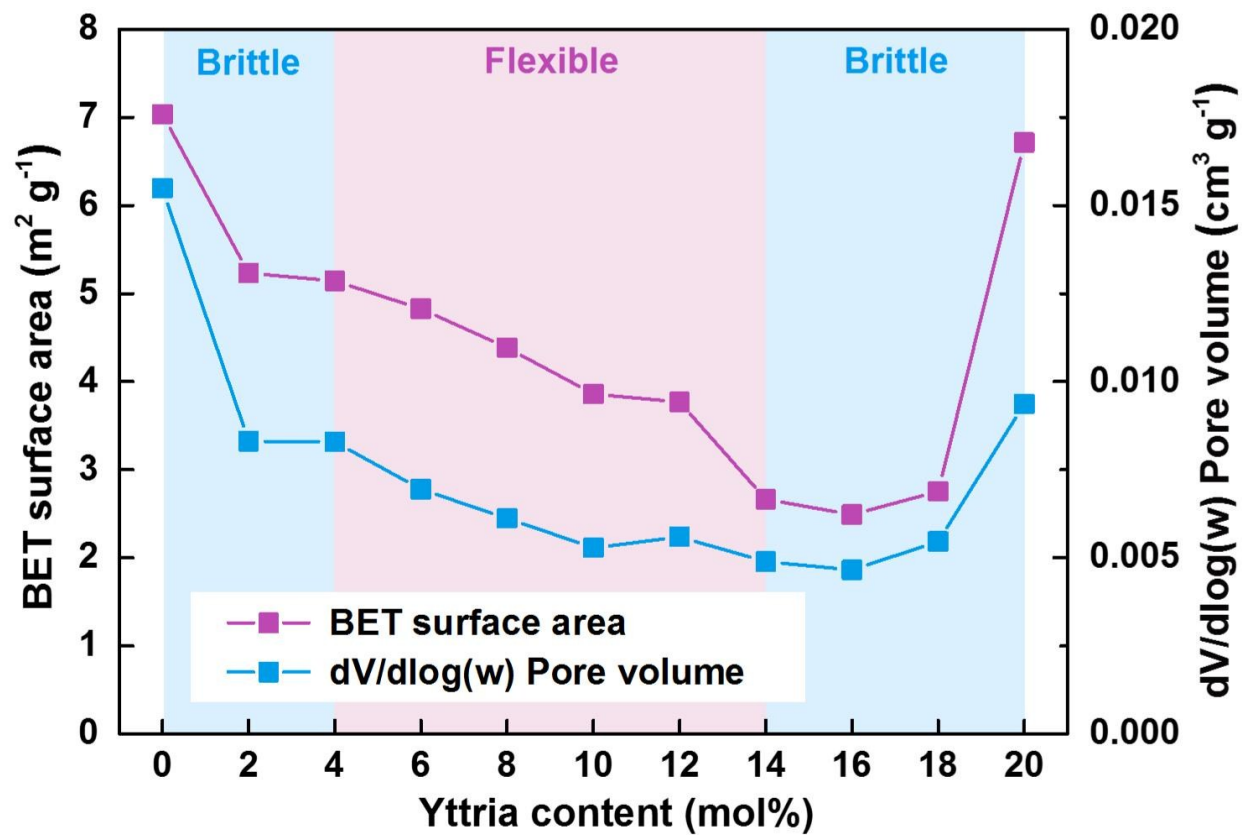

**Fig. S4** Flexible (pink) and brittle (blue) regions of zirconia and YSZ nanofibrous membranes with different BET surface areas and pore volumes.
